# Supplementary material for: MOSPD2 is a therapeutic target for the treatment of CNS inflammation
Source: PubMed Central journal article supplement — Clin Exp Immunol. 2020 May 18;201(2):105–20. doi: 10.1111/cei.13448 (PMC7366745; doi:10.1111/cei.13448), 2020-05-18
Supplement: CEI-201-105-s001.pdf [file CEI-201-105-s001.pdf]

Figure S1

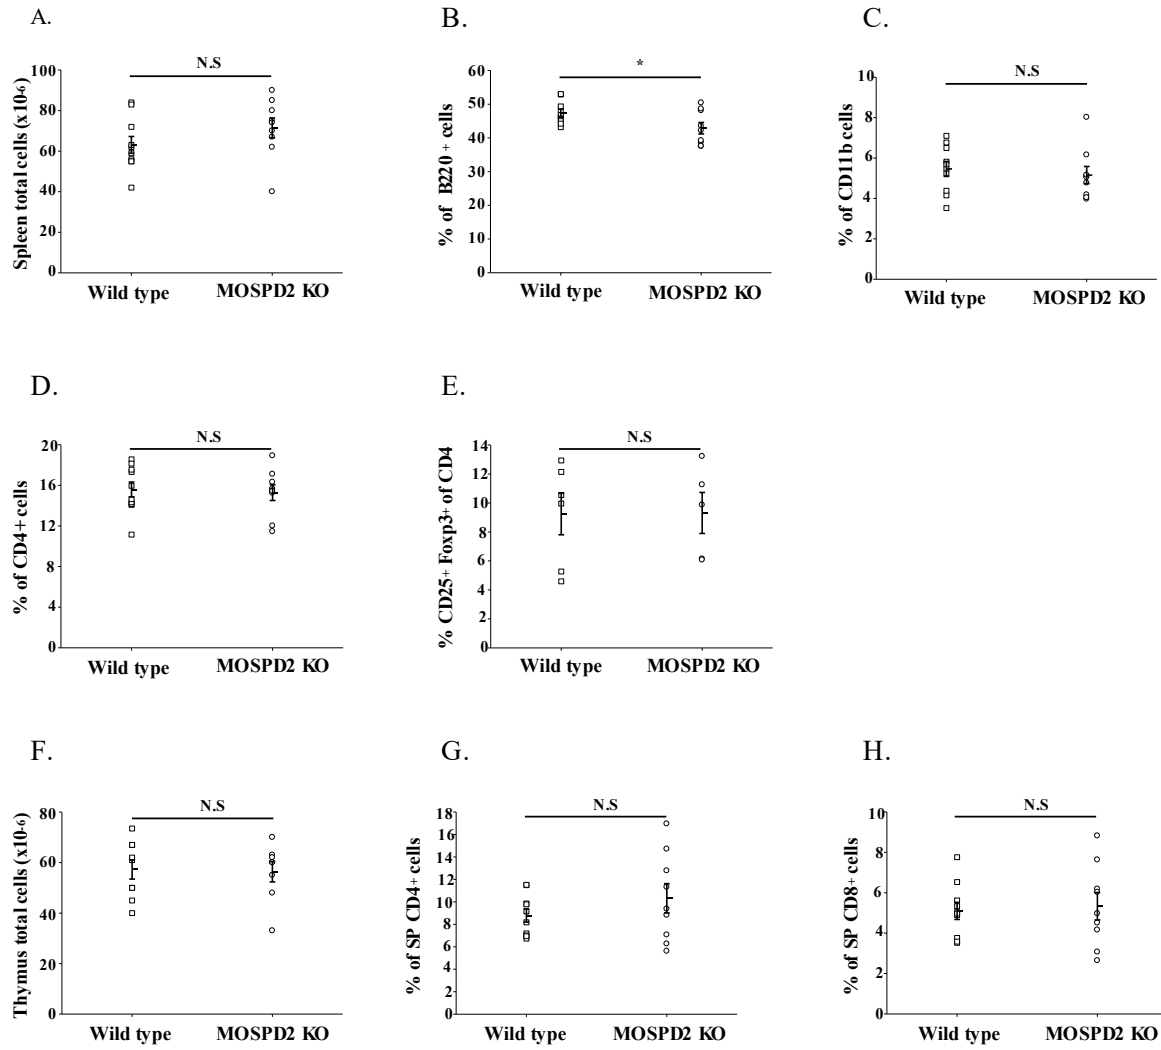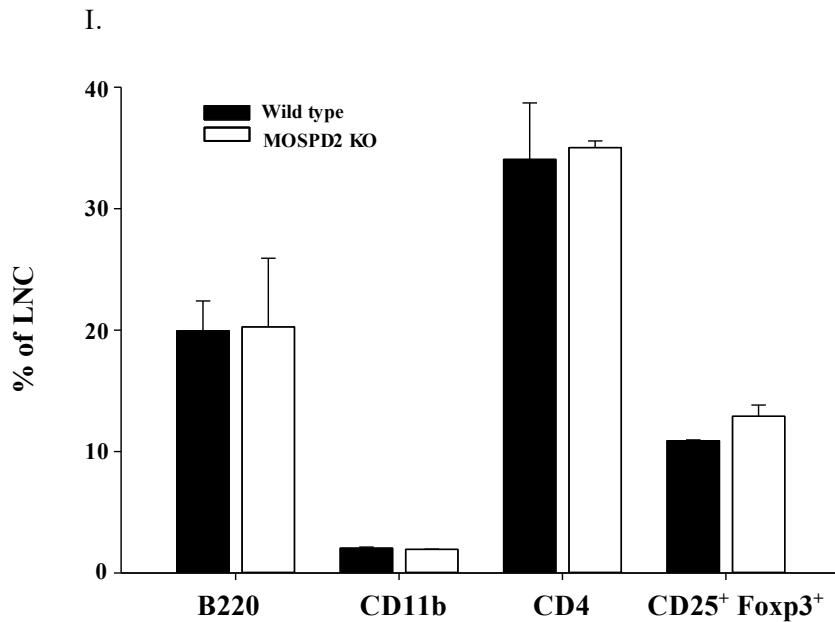

Figure S1: *Cell subset characterization in lymphoid tissues of MOSPD2 KO mice.* Total spleen cell count (A) Flow cytometric ratio evaluation in the spleen of (B) lymphocytes (C) myeloid (D) CD4 T-cells and (E) regulatory CD4<sup>+</sup> T-cells. (F) Total thymus cell count. Flow cytometric ratio evaluation in the thymus of (G) SP CD4 and (H) SP CD8 T-cells. (n= 5-10 per group). *P* values were calculated by Student's *t* test. Results are mean ± SE. \**p*≤0.05. (I) Flow cytometric ratio evaluation in lymph nodes. Mean ± SE of two experiments is shown. Each experiment includes a pool of five mice.
