# Supplementary material for: MOSPD2 is a therapeutic target for the treatment of CNS inflammation
Source: PubMed Central journal article supplement — Clin Exp Immunol. 2020 May 18;201(2):105–20. doi: 10.1111/cei.13448 (PMC7366745; doi:10.1111/cei.13448), 2020-05-18
Supplement: CEI-201-105-s002.pdf [file CEI-201-105-s002.pdf]

**Figure S2**

A.

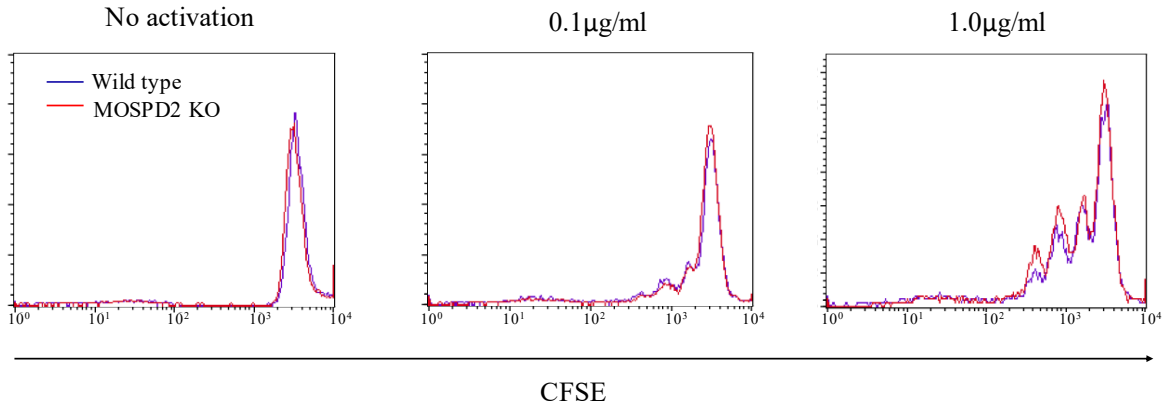

B.

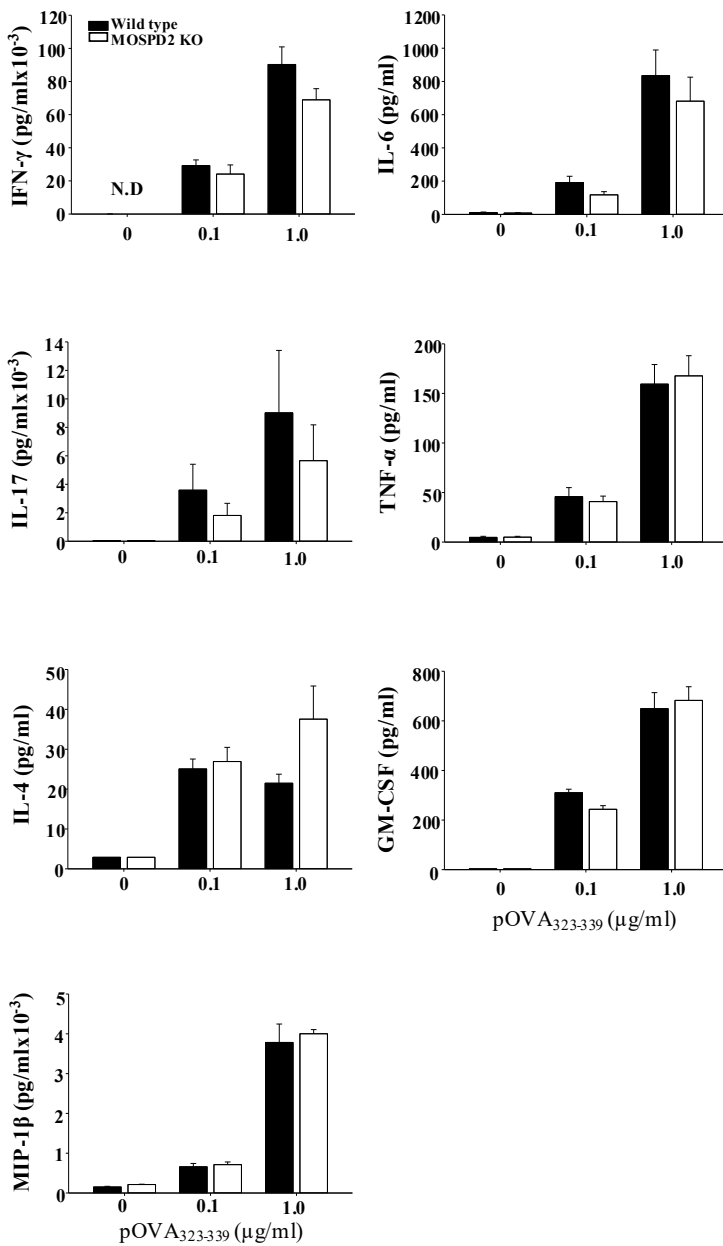

C.

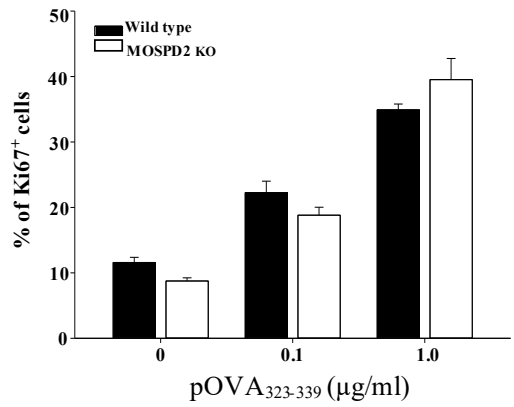

D.

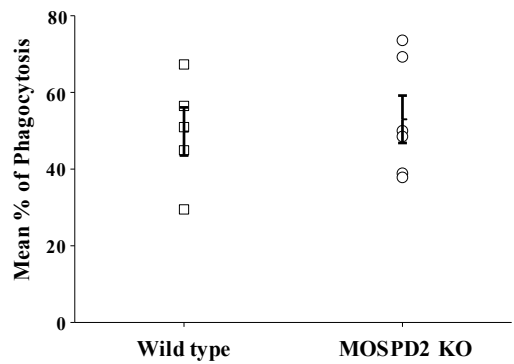

E.

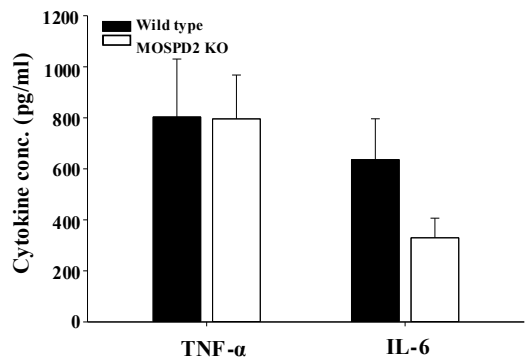

Figure S2: *Effector function in MOSPD2-deficient myeloid cells.* (A) Purified TCR Tg CD4<sup>+</sup> T cells specific for pOVA<sub>323-339</sub> were labelled with CFSE, co-cultured with monocytes isolated from wild-type (purple) or MOSPD2-deficient (red) mice, and activated for 72 hr in the presence of 0.1 µg/ml or 1 µg/ml peptide. CFSE dilution was analyzed by FACS. Each experiment was performed in triplicate. One of three experiments is shown. (B) OT-II T cells were co-cultured for 3 days with CD11b<sup>+</sup> myeloid cells isolated from spleens of wild-type and MOSPD2 KO mice in the presence of the antigen at the indicated concentration and supernatants were tested for the indicated cytokines (n=5-6 per group). Results are mean ± SE. (C) Wild-type and MOSPD2 KO mice were immunized with pOVA<sub>323-339</sub> in CFA and 7-10 days later lymph nodes were excised. Cells were challenged for 3 days and then tested for proliferation by flow cytometry using Ki-67 (n=6 per group). Results are mean ± SE. (D) Whole blood from wild-type and MOSPD2 KO mice was treated to deplete RBC. Leukocytes were incubated with PE-labeled *E. coli* for 2 hr and the ratio of PE-labeled cells was measured. Results are on gated neutrophils based on SSC and FSC (n=5-6). Results are mean ± SE. (E) CD11b<sup>+</sup> myeloid cells were isolated from spleens of wild-type and MOSPD2 KO mice in the presence of LPS (100 ng/ml) for 24 hr. Supernatants were collected and tested by ELISA for TNF-α and IL-6 (n=8 per group). Results are mean ± SE.
