# Supplementary material for: MOSPD2 is a therapeutic target for the treatment of CNS inflammation
Source: PubMed Central journal article supplement — Clin Exp Immunol. 2020 May 18;201(2):105–20. doi: 10.1111/cei.13448 (PMC7366745; doi:10.1111/cei.13448), 2020-05-18
Supplement: CEI-201-105-s003.pdf [file CEI-201-105-s003.pdf]

**Figure S3**

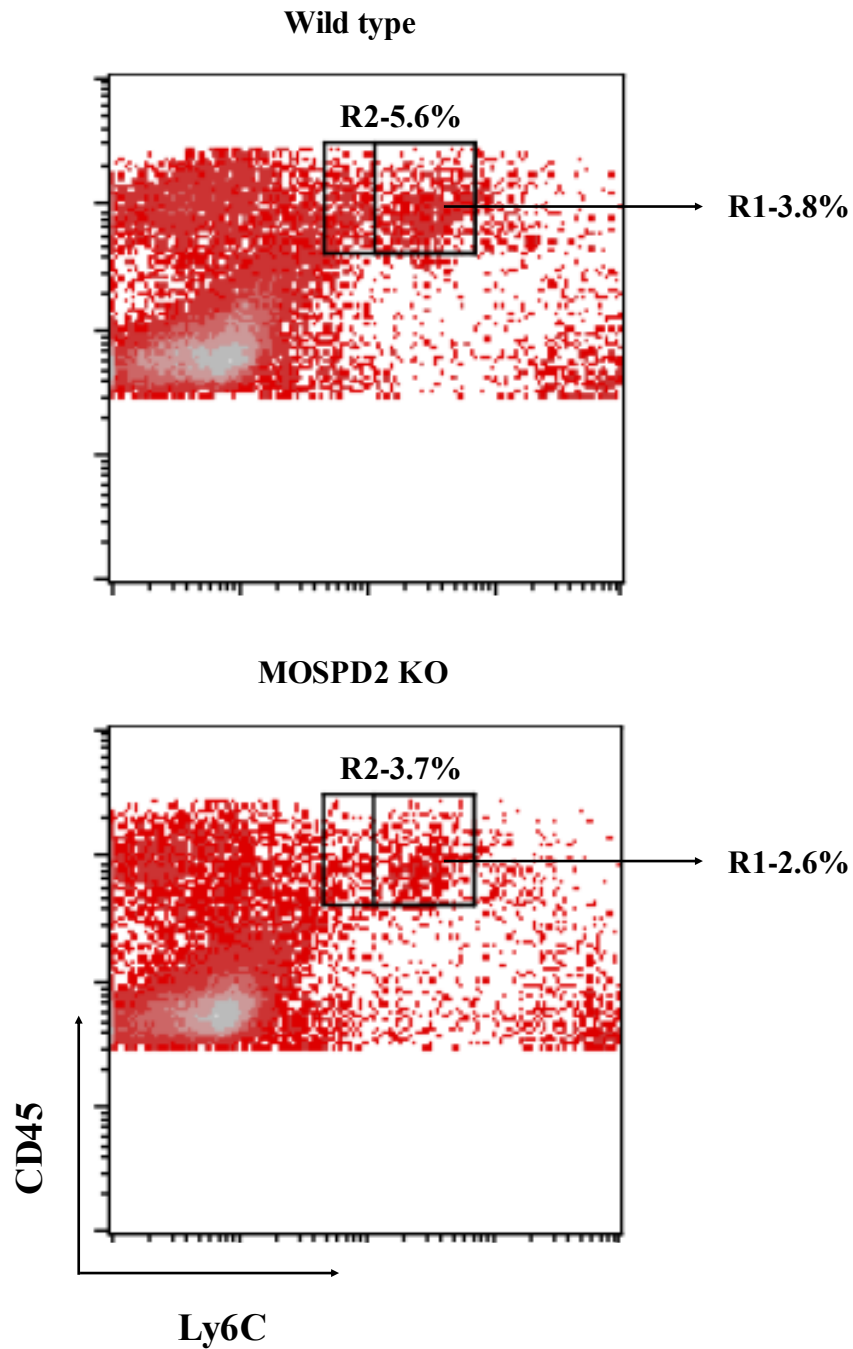

Figure S3: *Infiltration of inflammatory monocytes into the CNS*. Mononuclear cells were isolated from the brains of wild-type and MOSPD2 KO mice on day 38 after EAE induction and stained for CD45 and Ly6C. CD45 is used to distinguish between CNS-resident microglia (CD45<sup>low</sup>) and invading leukocytes (CD45<sup>high</sup>). Results are of pooled mononuclear cells from five mice from each group.
