# Supplementary material for: MOSPD2 is a therapeutic target for the treatment of CNS inflammation
Source: PubMed Central journal article supplement — Clin Exp Immunol. 2020 May 18;201(2):105–20. doi: 10.1111/cei.13448 (PMC7366745; doi:10.1111/cei.13448), 2020-05-18
Supplement: CEI-201-105-s004.pdf [file CEI-201-105-s004.pdf]

**Figure S4**

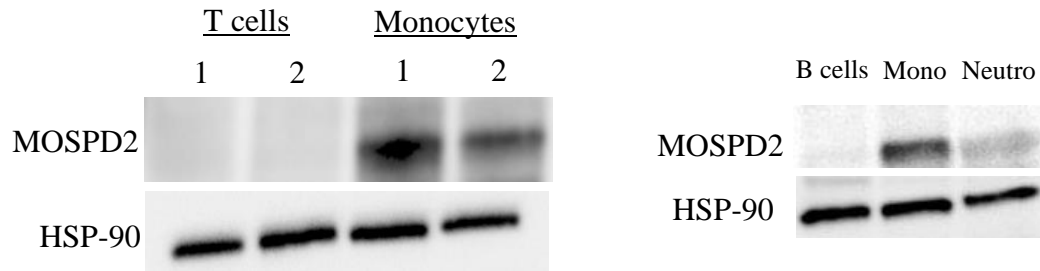

Figure S4: *Expression of MOSPD2 in mouse immune cell subsets.* B cells and monocytes were isolated from the spleen of wild-type mice using CD45R and CD11b microbeads, respectively. Neutrophils were isolated from the BM using mouse Neutrophil Isolation Kit.
